# Supplementary material
Source: Springer Nature journal article supplement (https://www.springermedizin.de/resource/supplementary/12936_2010_1600_MOESM5_ESM.pdf/9541666)

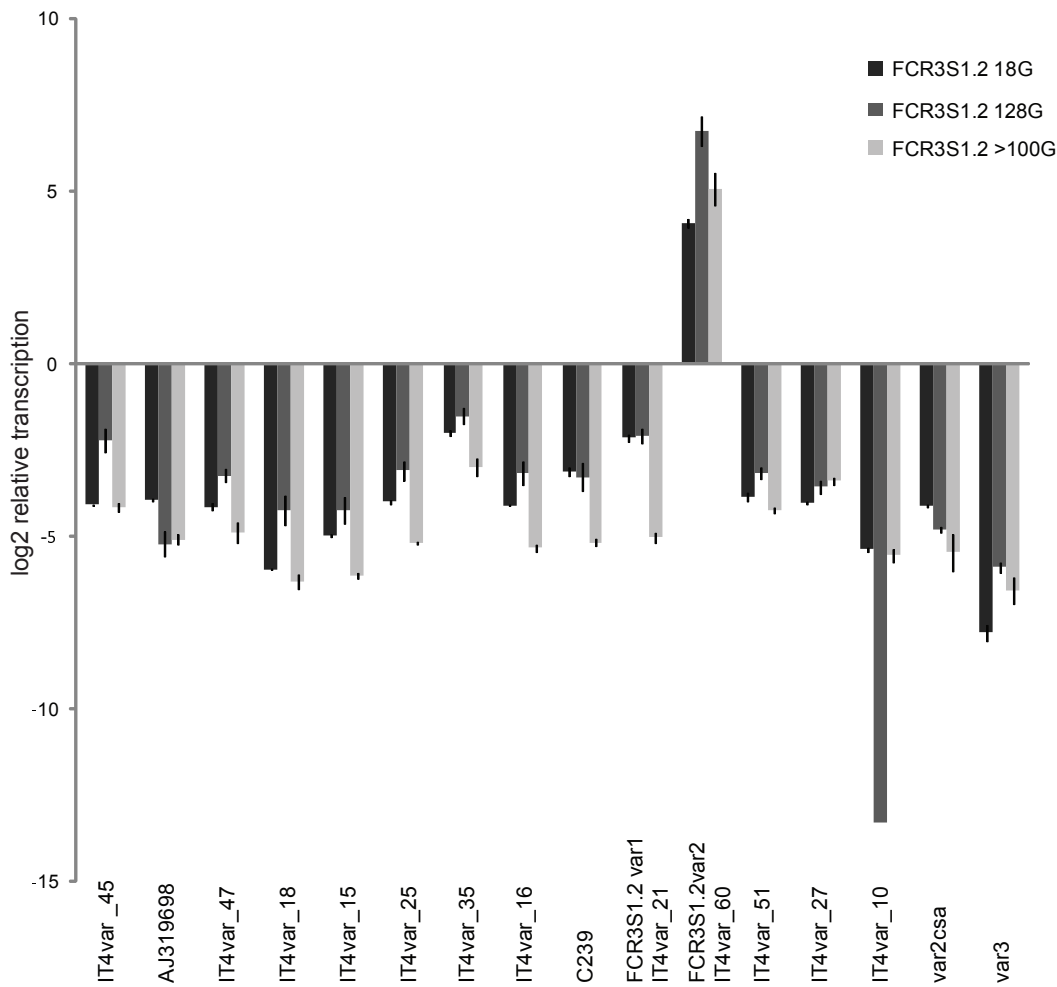

Supplement: MOESM5 [file 9541666]
